# Supplementary material for: A Review of the In Vivo Evidence Investigating the Role of Nitrite Exposure from Processed Meat Consumption in the Development of Colorectal Cancer
Source: Nutrients. 2019 Nov 5;11(11):2673. doi: 10.3390/nu11112673 (PMC6893523; doi:10.3390/nu11112673)
Supplement: Supplementary file 1 [file nutrients-11-02673-s001.xlsx]

## Sheet: Supplemetary table 1
Supplementary table 1; Characteristics of prospective human studies assessing colorectal cancer and processed meat consumption
Author	Sample size	Colorectal cancer cases	Frequency of consumption	Relative Risk (CI)	Covariates	Findings
[76] Willet et al. 1990	88751	150	<1/month	1	Age	Significantly ↑ risk of CRC
			1-3/month	1.09 (0.70-1.69)
			1/week	1.45 (0.91-2.31)
			2-4/week	1.86 (1.16-2.98)
			5-6/week / >1/day	1.21 (0.53-2.72)
[35] Oba et al. 2005	31552	213	Low	1	Age, height, BMI, total pack years of cigarette smoking, alcohol intake and physical activity	Significantly ↑ risk of CRC in ♂ not ♀
			Medium	1.25 (0.77-2.03)♂ 1.13 (0.72-1.77)♀
			High	1.98 (1.24-3.16)♂ 0.85 (0.50-1.43)♀
[77] Goldbohm et al. 1994	3123	393	0 g/day	1	Age, energy intake, sex, dietary fiber intake	Significantly ↑ risk of CRC
			0-10 g/day	1.23 (0.76-1.98)
			10-20 g/day	1.43 (0.87-2.35)
			>20 g/day	1.72 (1.03-2.87)
[38] Giovannucci et al. 1994	47949	205	1	1	Age	No significant risk of CRC
			2	1.25 (0.87-1.80)
			3	1.40 (0.92-2.13)
			4	1.67 (1.06-2.61)
			5	1.16 (0.44-3.04)
[40] Takachi et al. 2011	98514	1145	1	1	age, area, BMI, smoking status, alcohol consumption, physical activity, medication use for diabetes, history of diabetes, fecal occult blood test; barium enema; colonoscopy), and intake of; energy, calcium, vitamin D, vitamin B6, folate, dietary fiber, and dried and salted fish	No significant risk of CRC
			2	1.11 (0.85-1.46)♂ 1.26 (0.89-1.79)♀
			3	0.91 (0.68-1.22)♂ 1.10 (0.76-1.58)♀
			4	1.05 (0.79-1.41)♂ 1.12 (0.77-1.62)♀
			5	1.27 (0.95-1.71)♂ 1.19 (0.82-1.74)♀
[78] Norat et al. 2005	478040	1329	<10 g/day	1	age, sex, energy from nonfat sources, energy from fat sources , height, weight, occupational physical activity, smoking status, dietary ﬁber, alcohol intake, and stratiﬁed for center	Significantly ↑ risk of CRC
			10-20 g/day	1.10 (0.91-1.32)
			20-40 g/day	1.12 (0.94-1.35)
			40-80 g/day	1.14 (0.94-1.40)
			>80	1.42 (1.09-1.86)
[46] Wu et al. 2006	14032	581‡	1	1	age, family history of colorectal cancer, reason for endoscopy, negative endoscopy history, physical activity, smoking status, race, aspirin use, total energy intake, and calcium and folate intake	Significantly ↑ risk of CRC
			2	1.22 (0.89-1.70)
			3	1.34 (1.00-1.80)
			4	1.36 (1.00-1.86)
			5	1.52 (1.12-2.08)
[74] Pietinen et al. 1999	27, 111	185	26g	1	age and supplement group, smoking years, BMI, alcohol, education, physical activity at work, and calcium intake.	No significant risk of CRC
			50g	1.50 (1.0-2.2)
			73g	1.10 (0.7-1.8)
			122g	1.20 (0.7-1.8)
[44] English et al. 2004	37112	284	<1.5	1	sex, country of birth, and intake of; energy, fat, and cereal products	Significantly ↑ risk of CRC
			1.5-1.9	1.30 (1.0-1.7)
			2.0-3.9	1.0 (0.8-1.4)
			4.0+	1.50 (1.1-2.0)
[36] Bostick et al. 1994	35215	212	0 servings /week	1	age, total energy intake, height, parity, total vitamin E intake, a total vitamin E by age interaction term, and vitamin A supplement intake	No significant risk of CRC
			0.5 servings /week	1.00 (0.73-1.38)
			1 servings /week	1.07 (0.71-1.61)
			1-2 servings /week	0.81 (0.46-1.44)
			>3 servings /week	1.51 (0.72-3.17)
[79] Parr et al. 2013	84210	674	<15 g/day	1	intake of energy, alcohol, ﬁber, calcium, BMI, smoking status, and physical activity score categories	Significantly ↑ risk of CRC
			30 - < 45 g/day	0.98 (0.75-1.27)
			45 - <60 g/day	1.04 (0.79-1.39)
			>60 g/day	1.06 (0.75-1.49)
				1.54 (1.08-2.19)
[80] Larsson et al. 2005	61433	733	<12 g/day	1	age, BMI, educational level and intakes of total energy, alcohol, saturated fat, calcium, folate, fruits, vegetables and whole grain foods	No significant risk of CRC
			12-21 g/day	1.06 (0.87-1.30)
			22-31 g/day	1.12 (0.90-1.39)
			>32 g/day	1.32 (1.03-1.68)
[27] Lin et al. 2004	37547	202	1	1	age, random treatment assignment, BMI, family history of colorectal cancer, history of colorectal polyps, physical activity, cigarette smoking, alcohol consumption, postmenopausal hormone therapy, and total energy intake.	No significant risk of CRC
			2	1.18 (0.79-1.77)
			3	1.27 (0.84-1.91)
			4	0.95 (0.60-1.49)
			5	0.85 (0.85-1.35)
[81] Egeberg et al. 2013	53988	914	>0 - <16 g/day	1	waist circumference , education, smoking status, hormone replacement therapy status, sports activities, alcohol abstainer alcohol intake, NSAID use, dietary fiber intake, and total energy	No significant risk of CRC
			>16 to <27 g/day	0.96 (0.77-1.20)
			>27 to <42 g/day	0.96 (0.75-1.22)
			>42 g/day	1.02 (0.78-1.34)
[70] Cross et al. 2007	494036	5107	1	1	age, sex, education, marital status, family history of cancer, race, BMI, smoking, frequency of vigorous physical activity, total energy intake, alcohol intake, and fruit and vegetable consumption	Significantly ↑ risk of CRC
			2	1.05 (0.96-1.16)
			3	1.09 (0.99-1.20)
			4	1.18 (1.07-1.30)
			5	1.20 (1.09-1.32)
[82] Bradbury et al. 2019	468910	2576	never	1	education, smoking status, waist circumference, height, physical activity, alcohol intake, family history of colorectal cancer , aspirin or ibuprofen use, use of vitamin D supplements, use of folate supplements and in women only: parity, menopause, oral contraceptive agent use and HRT use.	Significantly ↑ risk of CRC
			<once/week	1.09 (0.92-1.29)
			once/week	1.14 (0.96-1.34)
			> 2 times/week	1.19 (1.01-1.41)
[98] Cross et al. 2010	300948	2719	1	1	gender, education, BMI, smoking, and intake of; energy, dietary calcium.	Significantly ↑ risk of CRC
			2	1.04 (0.91-1.18)
			3	1.07 (0.94-1.23)
			4	1.16 (1.02-1.32)
			5	1.16 (1.01-1.32)
[71] Chao et al. 2005	148610	1197	1	1	age, sex, total energy, education, body mass index, cigarette smoking, recreational physical activity, use of hormone therapy (women), multivitamin use, aspirin use, beer, wine, liquor, fruits, vegetables, and highfiber grain foods.	Significantly ↑ risk of CRC at a single time point (1.33 95% CI, 1.08-1.64)
			2	0.90 (0.74-1.11)
			3	1.01 (0.83-1.23)
			4	1.02 (0.82-1.27)
			5	1.13 (0.91-1.41)
[37] Flood et al. 2002	45496	487	1	1	Energy, meat intake	No significant risk of CRC
			2	0.90 (0.68-1.18)
			3	0.83 (0.63-1.11)
			4	1.09 (0.84-1.43)
			5	0.97 (0.73, 1.28)
[99] Lee et al. 2009	74942	394	Never	1	age, education, income, survey season, tea consumption, and energy intake	No significant risk of CRC
			< 1 time/month	0.90 (0.7-1.1)
			> 1 time/month	1.10 (0.8-1.4)
[84] Ollberding et al. 2012	215000	3404	1	1	adjusted for family history of colorectal cancer, history of colorectal polyp, BMI, pack-years of cigarette smoking, nonsteroidal anti-inflammatory use, alcohol consumption, vigorous physical activity, history of diabetes, hormone replacement therapy use (females only), total calories, dietary fiber, calcium, folate and vitamin D	No significant risk of CRC
			2	0.98 (0.87-1.09)
			3	1.04 (0.93-1.16)
			4	1.00 (0.90-1.13)
			5	1.06 (0.94-1.19)
[39] Sato et al. 2006	47605	358	Almost never	0.98 (0.74-1.31)	sex, age, smoking status, alcohol consumption, BMI, education, family history of cancer, time spent walking, consumption of fat, calcium, and dietary fibre	No significant risk of CRC
			1-2 times/month	1.02 (0.77-1.36)
			3-4 times/month	0.91 (0.61-1.35)
[33] Knekt et al. 1999	9985	73	1	1	Sex, age, municipality, smoking and energy	No significant risk of CRC
			2	0.82 (0.45-1.48)
			3	0.94 (0.50-1.78)
			4	0.74 (0.34-1.63)
↑ increased; BMI body mass index; CRC colorectal cancer; ♂ male; ♀ female. Where the authors did not provide the relative risks for males and females combined, we have provided the gender specific relative risks. Relative risk values reflect those in the highest consumption group vs those in the lowest consumption group.

## Sheet: Supplementary table 2
Supplemetary table 2; Characteristics of case control human studies assessing colorectal cancer and processed meat consumption
Author	Cases (n=)	Controls (n=)	Description of processed meat	Frequency of consumption	Relative Risk (CI)	Covariates	Findings
[51] Lohsoonthorn et al. 1995	279	279	Bacon		12.49 (1.68-269.1)		Significantly ↑ bacon consumption in cases group
[45] Levi et al. 2004	323	1271	Processed meat	<0.8	1	age, sex, education, tobacco smoking, alcohol drinking, total energy intake, and fruit and vegetable intake (for cancers of the upper digestive and respiratory tract); and education, tobacco smoking, alcohol drinking, total energy intake, fruit and vegetable intake, body mass index, and physical activity	Significantly ↑ risk of CRC
				0.8-4	1.03 (0.61-1.75)
				1.6-3.9	1.82 (1.12-2.95)
				>4	2.53 (1.50-4.27)
[85] De Stefani et al. 2012	321	844	Processed meat	T1	1	age, residence, body mass index, smoking status, smoking cessation, number of cigarettes smoked per day, alcohol drinking, maté consumption, total energy, total vegetables and fruits, total white meat, and red meat intakes	Significantly ↑ risk of CRC
				T2	2.25 (1.19-4.23)♀ 1.78 (0.94-3.28)♂
				T3	3.53 (1.93-6.46)♀ 2.01 (1.07-3.76)♂
[47] Haenszel et al. 1973	179	357	Sausage and other processed pork	<6	1	sex and nativity	Significantly ↑ risk of CRC
				>6	1.47Ϟ 1.42Ф 1.5҂
				6 - 11	1.27Ϟ 1.47Ф 1.12҂
				12 - 23	1.35Ϟ 1.25Ф 1.44҂
				>24	2.30Ϟ 1.77Ф 2.7҂
[34] Young and Wolf 1988	152ⱡ 201‡	618	Processed lunch meat	-	1.85 (1.33-2.58)	age and sex	Significantly ↑ risk of CRC
[50] Bidoli et al. 1992	123¥ 125₸	699	Salami and sausages	1	1	age, sex, social status	Sig ↑₸ but not ¥
				2	1.10¥ 1.3₸
				3	1.80¥ 1.9₸
[49] De Verdier et al. 1991	559	505	Bacon	More seldom	1	year of birth, gender, fat intake	Sig ↑₸ but not ¥
				1-3 times /month	0.90 (0.7-1.3)¥ 1.5 (1.0-2.2)₸
				> once/ week	1.30 (0.8-1.9)¥ 1.7 (1.1-2.8)₸
[86] Hu et al. 2008	3174	5039	Processed meats	1	1	age, province, education, BMI, sex, alcohol use, pack-year smoking, total of vegetable and fruit intake, and total energy intake	Significantly ↑ risk of CRC
				2	1.30 (1.0-1.5)
				3	1.50 (1.2-1.8)
				4	1.50(1.2-1.8)
[87] Rosato et al. 2013	329	1361	Processed meat	1	1	age, sex, center, study, year of interview, education, family history, alcohol consumption, and energy intake	Significantly ↑ risk of CRC
				2	1.18 (0.84-1.65)
				3	1.56 (1.11-2.20)
[53] Navarro et al. 2003	287	566	Cold cuts and sausages	1	1	fat intake	Significantly ↑ risk of CRC
				2	1.12 (0.77-1.61)
				3	1.64 (1.16-2.32)
[88] Williams et al. 2010	945	959	Processed meat	1	1	age, sex, education, BMI, family history, NSAID use, physical activity, calcium, ﬁber, total energy, and energy adjusted saturated protein	No significant risk of CRC
				2	1.21 (0.82-1.62)Ւ 1.54 (0.76-2.85)ⱦ
				3	1.56 (1.02-2.02)Ւ 0.59 (0.24-1.18)ⱦ
				4	1.36 (0.80-1.68)Ւ 1.02 (0.38-1.96)ⱦ
[89] Benito et al. 1990	286	498	Processed meat	1	1	age, sex and weight 10 years prior to interview	No significant risk of CRC
				2	1.35
				3	1.42
				4	1.36
[41] Dales et al. 1978	99	280	Nitrite treated meats	-	1.22	potentially confounding covariates	No significant risk of CRC
[42] Macquart-Moulin 1986	399	399	Charcuterie	1	1	age, sex, calories, weight	Significantly ↑ risk of CRC
				2	1.31
				3	0.88
				4	0.89
[48] Tajima and Tomina 1985	93	186	Ham and sausage	1	1	age and sex	Significantly ↑ risk of CRC
				2	2.19
				3	2.87
[90] Nothlings et al. 2009	1009	1522	Processed meat	0-<3.5	1	sex, age at blood draw, and ethnicity, family history of colorectal cancer, BMI, intake of dietary fiber, calcium, vitamin D, folic acid, ethanol, physical activity, smoking status and pack-years of smoking, or meat intake	No significant risk of CRC
				3.5-<6.7	1.04 (0.82-1.32)
				6.7 -<11.0	1.13 (0.89-1.44)
				110+	1.08 (0.89-1.39)
[91] Franchechi et al. 1997	1225	4154	Processed meat	1	1	age, sex,centre, education, physical activity and total energy intake	No significant risk of CRC
				2	1.21 (1.03-1.42)
				3	1.06 (0.89-1.26)
				4	1.24 (1.02-1.49)
				5	1.02 (0.89-1.24)
[92] Balder et al. 2006	1535	4371	Processed meats	1	1	age, BMI, family history of colorectal cancer, cigarette smoker, non occupational physical activity, total energy intake, consumption of alcohol, and total vegetable consumption.	No significant risk of CRC
				2	1.02 (0.74-1.41)
				3	0.98 (0.71-1.36)
				4	1.18 (0.84-1.64)
[93] Kimura et al. 2007	782	793	Processed meats	1	1	age, sex, residential area, BMI, parental colorectal cancer, smoking, alcohol use, type of job, leisure-time physical activity, dietary calcium and dietary fiber	No significant risk of CRC
				2	1.03 (0.74-1.43)
				3	1.09 (0.79-1.52)
				4	1.07 (0.77-1.49)
				5	1.15 (0.83-1.60)
[94] Murtaugh et al. 2003	952	1205	Processed meat	1	1	age, BMI, energy intake, dietary ﬁber, calcium, lifetime physical activity, and usual number of cigarettes smoked	No significant risk of CRC
				2	0.95 (0.71-1.28)♀ 1.21 (0.85-1.72)♂
				3	1.18 (0.87-1.61)♀ 1.23 (0.84-1.81)♂
[95] Joshi et al. 2015	3350	3504	Sausage and lunchmeat	1	1	age, BMI, gender, race ,saturated fat, dietary ﬁber, center, vegetables, physical activity, and total calorie intake	No significant risk of CRC
				2	1.10 (0.9-1.3)
				3	1.20 (1.0-1.4)
				4	1.0 (0.9-1.2)
				5	1.20 (1.0-1.4)
[32] Steinmetz and Potter 1993	220	438	Processed meat	1	1	occupation, unadjusted Quetelet’s index, and alcohol intakes	No significant risk of CRC
				2	0.69 (0.35-1.37)♂ 1.44 (0.70-2.93)
				3	0.68 (0.35-1.34)♂ 1.15 (0.57-2.32)
				4	1.03 (0.55-1.95)♂ 0.77 (0.35-1.68)♀
[96] Centozone 2009	119	119	Processed meat	1	1	age, sex, level of education, smoking status, and modification of diet in the past	No significant risk of CRC
				2	1.01
[97] Tiemersma et al. 2002	102	537	Sausage	1	1	age, sex, center, total energy intake, alcohol consumption, and body height.	No significant risk of CRC
				2	0.90 (0.6-1.3)
[100] Iscovich et al. 1992	110	220	Processed meat	1	1	unadjusted	Significantly ↓ risk of CRC
				2	0.83 (0.41-1.69)
				3	0.86 (0.42-1.79)
				4	0.43 (0.21-0.89)
[52] Nowell et al. 2002	157	380	Sausage and bacon		-	unadjusted	Significantly ↑ bacon consumption in cases group
↑ increased; ↓ decreased ⱡ Proximal colon; ‡ distal colon; ♂ male; ♀ female; ¥ colon; ₸ rectal; BMI body mass index; CRC colorectal cancer; ♂ male; ♀ female; Ϟ Hawaiian; Ф Issei; ҂Nisei. Where the authors did not provide the relative risks for males and females combined, we have provided the gender specific relative risks. Relative risk values reflect those in the highest consumption group vs tho…
